The impact of relationship to cancer patient and extent of caregiving on adherence to cancer screening in a diverse inner-city community

*Cynthia Matsumura, Brieyona C. Reaves, Bruce D. Rapkin*

The authors have withdrawn their manuscript because of the nature of the errors inadvertently found in data analysis and their potential impact on the results. Younger age ranges in the analyses for screening were not consistent throughout the manuscript. The authors plan to correct accordingly. Therefore, they do not wish this work to be cited as reference for the project. If you have any questions, please contact the corresponding author.
